# Supplementary material
Source: PubMed Central journal article supplement (PMC8670105)
Supplement: mmc3.pdf [file mmc3.pdf]

### Appendix 3 – Search Strategy

MEDLINE® (via PubMed®), Google® Scholar.

#### Generic search strategy

(pharmacy OR pharmacist) AND (“COVID-19” OR “coronavirus” OR “SARS-CoV-2”) NOT hospital NOT clinic NOT ambulatory NOT inpatient

##### 1) MEDLINE® (via PubMed®)

Search: (pharmacy[Title/Abstract] OR pharmacist)[Title/Abstract] AND ("COVID-19"[Title/Abstract] OR "coronavirus"[Title/Abstract] OR "SARS-CoV-2") NOT hospital NOT clinic NOT ambulatory NOT inpatient[Title/Abstract]

(((((("pharmacy"[Title/Abstract] OR ("pharmacist s"[All Fields] OR "pharmacists"[MeSH Terms] OR "pharmacists"[All Fields] OR "pharmacist"[All Fields])) AND ("COVID-19"[Title/Abstract] OR "coronavirus"[Title/Abstract] OR "SARS-CoV-2"[All Fields])) NOT ("hospital s"[All Fields] OR "hospitalisation"[All Fields] OR "hospitalization"[MeSH Terms] OR "hospitalization"[All Fields] OR "hospitalised"[All Fields] OR "hospitalising"[All Fields] OR "hospitality"[All Fields] OR "hospitalisations"[All Fields] OR "hospitalizations"[All Fields] OR "hospitalize"[All Fields] OR "hospitalized"[All Fields] OR "hospitalizing"[All Fields] OR "hospitals"[MeSH Terms] OR "hospitals"[All Fields] OR "hospital"[All Fields])) NOT ("ambulatory care facilities"[MeSH Terms] OR ("ambulatory"[All Fields] AND "care"[All Fields] AND "facilities"[All Fields]) OR "ambulatory care facilities"[All Fields] OR "clinic"[All Fields] OR "clinic s"[All Fields] OR "clinical"[All Fields] OR "clinically"[All Fields] OR "clinicals"[All Fields] OR "clinics"[All Fields])) NOT ("ambulatories"[All Fields] OR "ambulatory care facilities"[MeSH Terms] OR ("ambulatory"[All Fields] AND "care"[All Fields] AND "facilities"[All Fields]) OR "ambulatory care facilities"[All Fields] OR "ambulatory"[All Fields])) NOT "inpatient"[Title/Abstract]

##### 2) Google® Scholar

A singular – search in title, 2020 onwards, no authors identified.

|                                  |                                     |
|----------------------------------|-------------------------------------|
| <b>All words</b>                 | pharmacy                            |
| <b>Exact expression –</b>        | N/A                                 |
| <b>At least one of the words</b> | ”COVID 19” coronavirus “SARS CoV 2” |
| <b>Without the words</b>         | hospital clinic ambulatory          |

**B singular – search in title, 2020 onwards, no authors identified.**

|                                  |                                     |
|----------------------------------|-------------------------------------|
| <b>All words</b>                 | pharmacist                          |
| <b>Exact expression –</b>        | <i>N/A</i>                          |
| <b>At least one of the words</b> | ”COVID 19” coronavirus “SARS CoV 2” |
| <b>Without the words</b>         | hospital clinic ambulatory          |

**A plural – search in title, 2020 onwards, no authors identified.**

|                                  |                                     |
|----------------------------------|-------------------------------------|
| <b>All words</b>                 | pharmacies                          |
| <b>Exact expression –</b>        | <i>N/A</i>                          |
| <b>At least one of the words</b> | ”COVID 19” coronavirus “SARS CoV 2” |
| <b>Without the words</b>         | hospital clinic ambulatory          |

**B plural – search in title, 2020 onwards, no authors identified.**

|                                  |                                     |
|----------------------------------|-------------------------------------|
| <b>All words</b>                 | pharmacists                         |
| <b>Exact expression –</b>        | <i>N/A</i>                          |
| <b>At least one of the words</b> | ”COVID 19” coronavirus “SARS CoV 2” |
| <b>Without the words</b>         | hospital clinic ambulatory          |
